# Supplementary material for: Body Mass Index in Adolescence and Long‐Term Risk of Early Incident Atrial Fibrillation and Subsequent Mortality, Heart Failure, and Ischemic Stroke
Source: PubMed Central journal article supplement — J Am Heart Assoc. 2022 Oct 19;11(21):e025984. doi: 10.1161/JAHA.121.025984 (PMC9673644; doi:10.1161/jaha.121.025984), 2022-10-19
Supplement: JAH3-11-e025984-s001.pdf [file JAH3-11-e025984-s001.pdf]

## **SUPPLEMENTAL MATERIAL**

**Table S1. ICD codes of Atrial Fibrillation, baseline comorbidities and clinical outcomes**

| Diagnosis           | ICD 8                                                                | ICD 9                                                              | ICD 10                                      |
|---------------------|----------------------------------------------------------------------|--------------------------------------------------------------------|---------------------------------------------|
| Atrial fibrillation | 42792                                                                | 427D                                                               | I48.0-I48.9                                 |
| Diabetes mellitus   | 250                                                                  | 250                                                                | E10-E14                                     |
| Hypertension        | 401-405                                                              | 401-405                                                            | I10-I15                                     |
| ACH                 | 746-747                                                              | 745-747                                                            | Q2, Q332, Q871E, Q872, Q874, Q878, Q90, Q96 |
| Heart failure       | 42700                                                                | 428A, 428B, 428X                                                   | I50.0-I50.9                                 |
| Ischemic stroke     | 433,00, 433,99<br>434,00, 434,99<br>435,00, 435,99<br>436,00, 436,99 | 433A, 433B<br>433C, 433D<br>433W, 433X<br>434A, 434B<br>434X, 436X | I63.0-I63.9                                 |

International classification of diseases (ICD), ACH (adult congenital heart disease)

**Table S2. Event rates for atrial fibrillation relative to body mass index group**

|                                              | All           | BMI <18.5 kg/m <sup>2</sup> | BMI 18.5–<20.0 kg/m <sup>2</sup> | BMI 20.0–<22.5 kg/m <sup>2</sup> | BMI 22.5–<25.0 kg/m <sup>2</sup> | BMI 25.0–<27.5 kg/m <sup>2</sup> | BMI 27.5–<30.0 kg/m <sup>2</sup> | BMI 30.0–<35.0 kg/m <sup>2</sup> | BMI 35.0–<40.0 kg/m <sup>2</sup> | BMI 40.0–50.0 kg/m <sup>2</sup> |
|----------------------------------------------|---------------|-----------------------------|----------------------------------|----------------------------------|----------------------------------|----------------------------------|----------------------------------|----------------------------------|----------------------------------|---------------------------------|
| n (%)                                        | 1704467 (100) | 138645 (8.1)                | 307135 (18.0)                    | 687070 (40.3)                    | 362485 (21.3)                    | 126193 (7.4)                     | 44592 (2.6)                      | 30800 (1.8)                      | 6244 (0.4)                       | 1302 (0.1)                      |
| Events, n (%)                                | 36693 (100)   | 2871 (7.8)                  | 6228 (16.9)                      | 14176 (38.6)                     | 7967 (21.7)                      | 3008 (8.2)                       | 1260 (3.4)                       | 953 (2.6)                        | 190 (0.5)                        | 40 (0.1)                        |
| Cases per 100 000 observed person years (CI) | 68 (67–69)    | 61 (59–63)                  | 61 (59–62)                       | 65 (63–66)                       | 73 (71–74)                       | 82 (79–85)                       | 100 (94–105)                     | 114 (107–121)                    | 122 (105–140)                    | 131 (93–178)                    |
| Age at diagnosis, year(SD)                   | 52.4 (10.6)   | 54.0 (10.3)                 | 53.6 (10.3)                      | 52.5 (10.6)                      | 51.7 (10.7)                      | 51.1 (10.8)                      | 50.7 (10.6)                      | 50.4 (10.3)                      | 48.3 (10.6)                      | 43.4 (10.3)                     |
| Median follow up time, year (IQR)            | 32 (24–41)    | 36 (26–45)                  | 34 (26–44)                       | 33 (25–41)                       | 31 (22–39)                       | 29 (21–38)                       | 28 (21–37)                       | 26 (19–35)                       | 24 (18–32)                       | 22 (17–30)                      |
| Person-years of follow-up                    | 53704092      | 4699225                     | 10186471                         | 21882960                         | 10972929                         | 3679934                          | 1262415                          | 834324                           | 155266                           | 30569                           |

BMI= body mass index; CI= Confidence intervals, IQR= Interquartile range, SD= Standard deviation.

**Table S3. Hazard Ratios (95% CIs) for Atrial Fibrillation by cardiovascular risk factors**

|                                  | <b>Multivariable adjusted Model</b> |
|----------------------------------|-------------------------------------|
| Events/population, n             | 24897/1297909                       |
| <b>Age</b>                       | 1.11(1.09-1.13)                     |
| P-value interaction              | 0.80                                |
| <b>Center</b>                    | 1.00(0.99-1.01)                     |
| P-value interaction              | 0.10                                |
| <b>Year</b>                      | 1.01(1.01-1.02)                     |
| P-value interaction              | 0.32                                |
| <b>Systolic blood pressure</b>   |                                     |
| 100–119 mmHg                     | 1                                   |
| 120–125 mmHg                     | 1.07(1.03-1.11)                     |
| 126–130 mmHg                     | 1.10(1.06-1.15)                     |
| 131–138 mmHg                     | 1.08(1.04-1.13)                     |
| 139–180 mmHg                     | 1.20(1.15-1.25)                     |
| P-value interaction              | 0.23                                |
| <b>Diastolic blood pressure</b>  |                                     |
| 40–59 mmHg                       | 1                                   |
| 60–65 mmHg                       | 0.99(0.95-1.04)                     |
| 66–70 mmHg                       | 1.00(0.96-1.05)                     |
| 71–76 mmHg                       | 1.00(0.95-1.04)                     |
| 77–100 mmHg                      | 1.03(0.99-1.08)                     |
| P-value interaction              | 0.73                                |
| <b>Cardiorespiratory fitness</b> |                                     |
| High (8-9)                       | 1                                   |
| Moderate (5-7)                   | 1.03 (0.99-1.07)                    |
| Low (1-4)                        | 1.17(1.12-1.22)                     |
| P-value interaction              | 0.06                                |
| <b>Muscle strength</b>           |                                     |
| High (8-9)                       | 1                                   |
| Moderate (5-7)                   | 0.91(0.82-1.01)                     |
| Low (1-4)                        | 0.93(0.83-1.05)                     |
| P-value interaction              | 0.004                               |
| <b>Parental education</b>        |                                     |
| High (8-9)                       | 1                                   |
| Moderate (5-7)                   | 1.04(0.99-1.08)                     |
| Low (1-4)                        | 1.02(0.96-1.06)                     |
| P-value interaction              | 0.27                                |
| <b>IQ</b>                        |                                     |
| High (8-9)                       | 1                                   |
| Moderate (5-7)                   | 1.04 (1.01-1.07)                    |
| Low (1-4)                        | 1.14(1.09-1.18)                     |
| P-value interaction              | 0.006                               |
| <b>Baseline comorbidities</b>    |                                     |
| <b>Diabetes</b>                  | 1.50(0.95-2.35)                     |
| P-value interaction              | 0.33                                |
| <b>Hypertension</b>              | 1.55(1.24-1.95)                     |
| P-value interaction              | 0.46                                |
| <b>GUCh</b>                      | 5.99(4.89-7.34)                     |
| P-value interaction              | 0.0004                              |

Hazard ratios were derived by Cox regressions (methods), and interactions by use of BMI as continuous variable (methods).

**Table S4. Event rates for clinical outcomes in patients with atrial fibrillation relative to body mass index group**

|                                                 | All                  | BMI<20.0<br>kg/m <sup>2</sup> | BMI 20–<br><25.0<br>kg/m <sup>2</sup> | BMI 25–<br><30.0<br>kg/m <sup>2</sup> | BMI ≥30<br>kg/m <sup>2</sup> |
|-------------------------------------------------|----------------------|-------------------------------|---------------------------------------|---------------------------------------|------------------------------|
| <b>All-cause mortality</b>                      |                      |                               |                                       |                                       |                              |
| total n (%)                                     | 36459 (100)          | 9037(24.8)                    | 22006 (60.4)                          | 4244 (11.6)                           | 1172 (3.2)                   |
| Events, n (%)                                   | 3767 (100)           | 917 (24.3)                    | 2083 (55.3)                           | 578 (15.3)                            | 189 (5.0)                    |
| Cases per 1000<br>observed person<br>years (CI) | 13.2 (12.8–<br>13.6) | 13.0 (12.1–<br>13.8)          | 11.9 (11.4–<br>12.5)                  | 18.0 (16.6–<br>19.6)                  | 22.6 (19.5–<br>26.0)         |
| Age at death, y<br>(SD)                         | 58.6(7.4)            | 59.3(7.4)                     | 58.7(7.4)                             | 57.9(7.5)                             | 56.1(8.1)                    |
| Median follow up<br>time, y (IQR)               | 6.0 (2.4–<br>12.0)   | 6.7 (2.9–12.1)                | 6.7 (2.8–12.5)                        | 6.5 (2.8–12.4)                        | 6.7 (3.3–11.6)               |
| Person-years of<br>follow up                    | 285692               | 70724                         | 174543                                | 32051                                 | 8373                         |
| <b>Heart Failure</b>                            |                      |                               |                                       |                                       |                              |
| Total n (%)                                     | 34534 (100)          | 8592 (24.9)                   | 20966 (60.7)                          | 3919 (11.3)                           | 1057 (3.1)                   |
| Events, n (%)                                   | 3251 (100)           | 808 (24.9)                    | 1818 (55.9)                           | 475 (14.6)                            | 150 (4.6)                    |
| Cases per 1000<br>observed person<br>years (CI) | 11.7 (11.3–<br>12.2) | 11.8 (11.0–<br>12.6)          | 10.7 (10.2–<br>11.2)                  | 15.5 (14.2–<br>17.0)                  | 19.2 (16.2–<br>22.5)         |
| Age of<br>diagnosis, y(SD)                      | 57.4(7.6)            | 57.6(8.3)                     | 57.7(7.3)                             | 56.8(7.7)                             | 55.2(7.5)                    |
| Median follow up<br>time, y IQR)                | 6.1 (2.5–<br>11.7)   | 6.2 (2.5–11.5)                | 6.2 (2.5–11.8)                        | 6.0 (2.4–11.6)                        | 5.9 (2.8–10.9)               |
| Person-years of<br>follow up                    | 269419               | 66920                         | 165627                                | 29526                                 | 7345                         |
| <b>Ischaemic Stroke</b>                         |                      |                               |                                       |                                       |                              |
| Total n (%)                                     | 35025 (100)          | 8641 (24.7)                   | 21183 (60.5)                          | 4078 (11.6)                           | 1123 (3.2)                   |
| Events, n (%)                                   | 921(100)             | 242 (26.3)                    | 522 (56.7)                            | 114 (12.4)                            | 43 (4.7)                     |
| Cases per 1000<br>observed person<br>years (CI) | 3.4 (3.1–3.6)        | 3.6 (3.1–4.0)                 | 3.1 (2.8–3.4)                         | 3.7 (3.1–4.5)                         | 5.4(3.9–7.3)                 |
| Age at<br>diagnosis, y(SD)                      | 61.2(6.8)            | 59.3(3.2)                     | 58.2(6.9)                             | 56.5(7.3)                             | 54.3(8.2)                    |
| Median follow up<br>time, y(IQR)                | 6.0 (2.4–<br>11.5)   | 6.1 (2.4–11.3)                | 6.1 (2.4–11.6)                        | 5.7 (2.2–11.1)                        | 5.7 (2.7–10.4)               |
| Person-years of<br>follow up                    | 260174               | 67834                         | 168028                                | 30761                                 | 7980                         |

BMI= body mass index; CI= Confidence intervals, IQR= Interquartile range, SD= Standard deviation.

**Figure S1. Study flowchart**

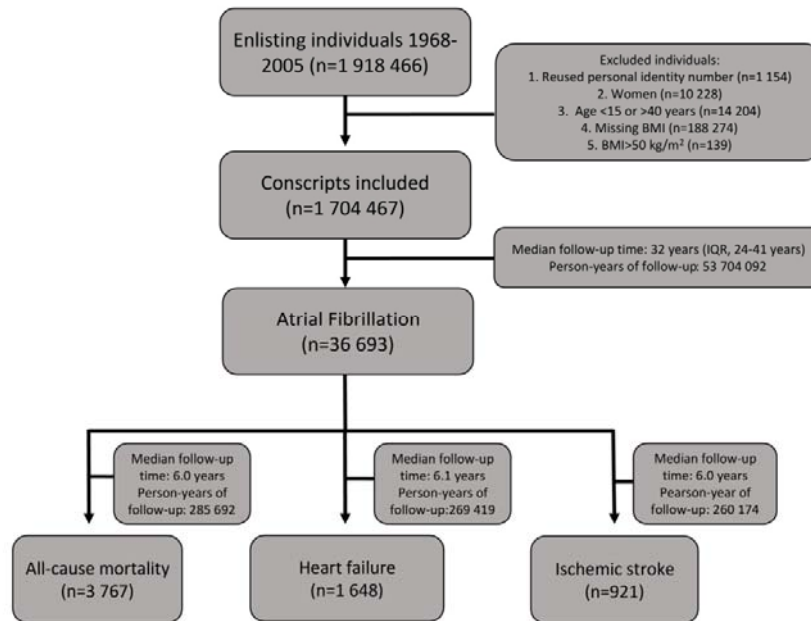

The flow chart is in accordance with the STROBE criteria.

BMI; Body mass index.

**Figure S2. Association between body mass index (BMI) at conscription and risk for Atrial Fibrillation**

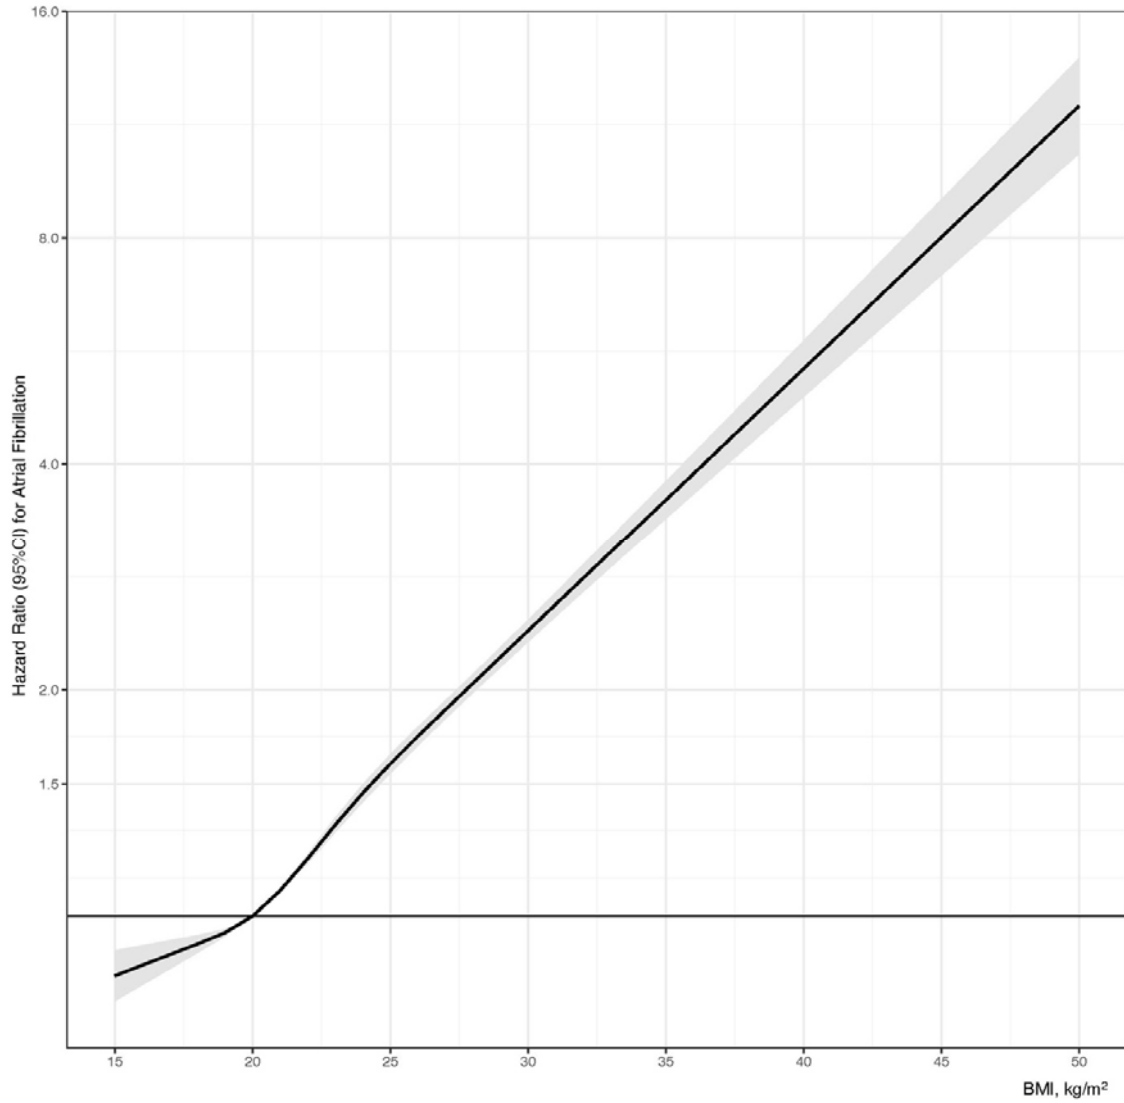

The model was unadjusted (n= 1704467). BMI was restricted to BMI between 15 and 50 kg/m<sup>2</sup> and modelled as a restricted cubic spline with knots at 5%, 25%, 75%, and 95% (i.e., 18.1, 19.9, 23.2, and 27.2 kg/m<sup>2</sup>), with BMI of 20 kg/m<sup>2</sup> as reference.

**Figure S3. Association between body mass index (BMI) at conscription and risk for all-cause mortality in patients diagnosed with Atrial Fibrillation**

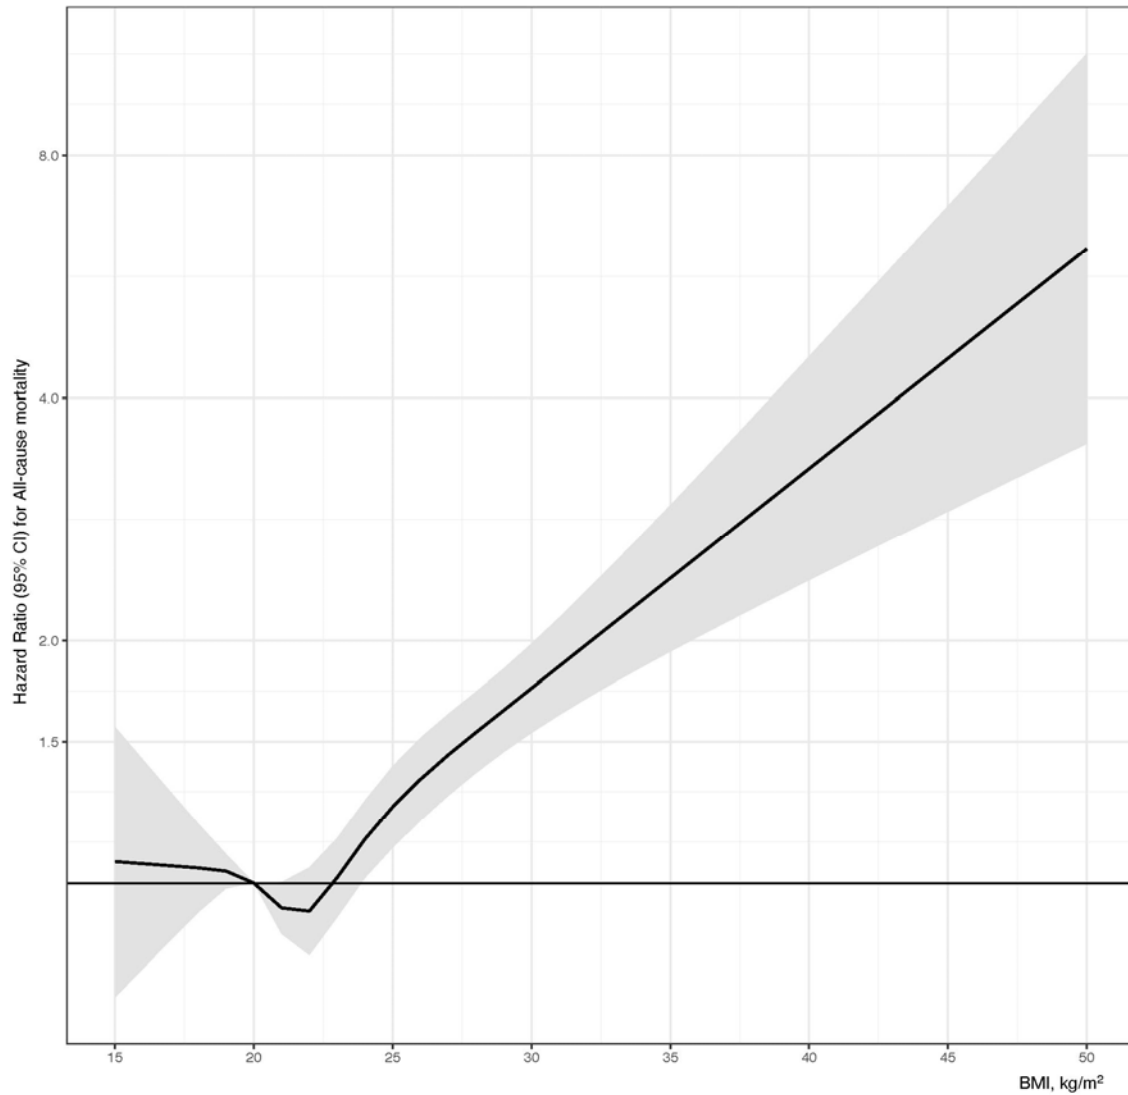

The model was unadjusted (n=36445). BMI was restricted to BMI between 15 and 50 kg/m<sup>2</sup> and modelled as a restricted cubic spline with knots at 5%, 25%, 75%, and 95% (ie, 18.1, 20.0, 23.2, and 27.2 kg/m<sup>2</sup>), with BMI of 20 kg/m<sup>2</sup> as reference.

**Figure S4. Association between body mass index (BMI) at conscription and risk for Heart failure (HF) in patients diagnosed with Atrial fibrillation (AF)**

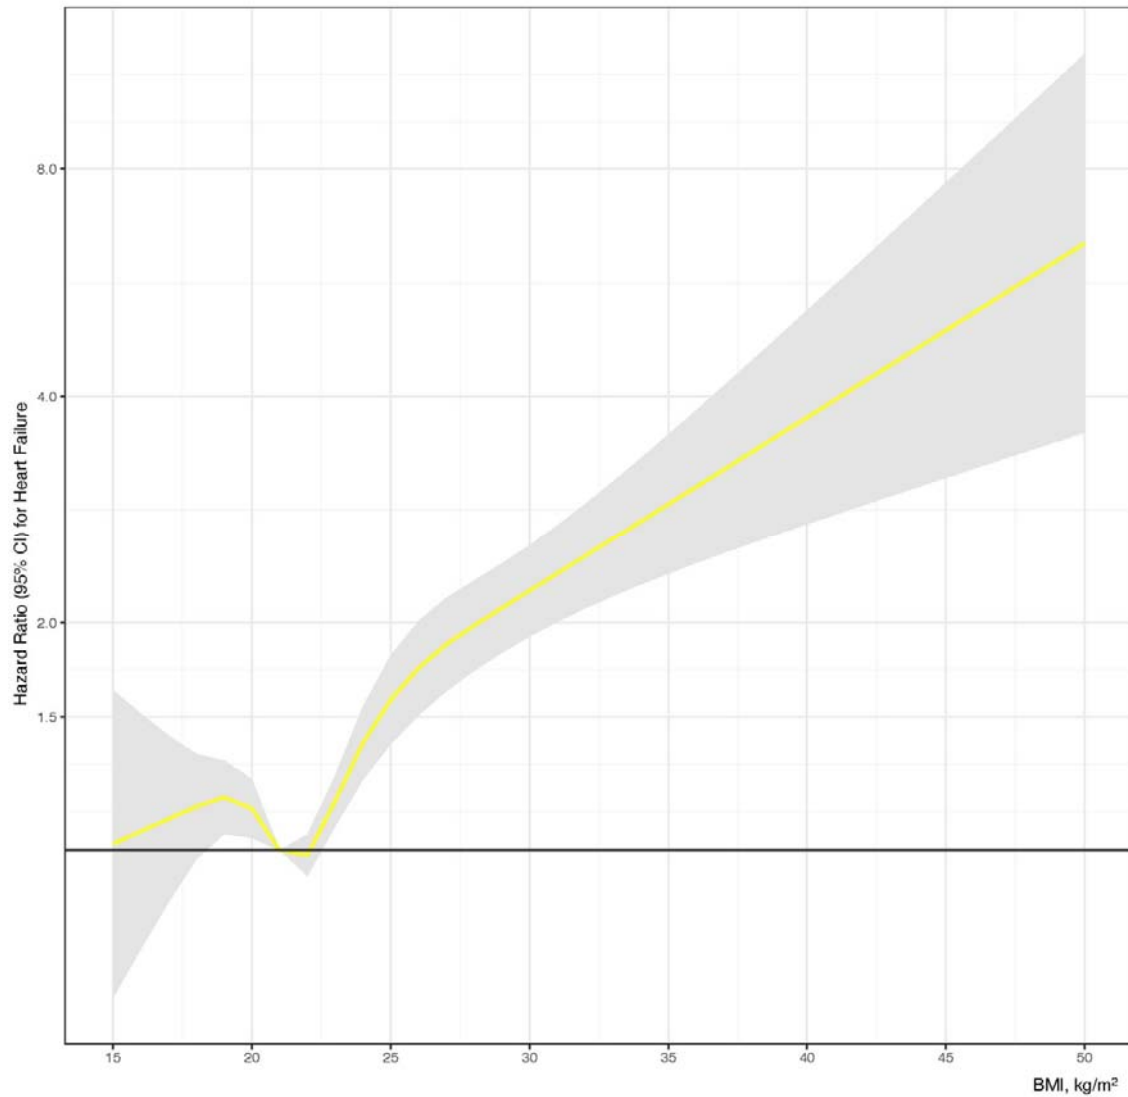

The model was unadjusted (n=34534). BMI was restricted to BMI between 15 and 50 kg/m<sup>2</sup> and modelled as a restricted cubic spline with knots at 5%, 25%, 75%, and 95% (ie, 18.0, 20.0, 23.4, and 27.8 kg/m<sup>2</sup>), with BMI of 22 kg/m<sup>2</sup> as reference.



**Figure S5. Association between body mass index (BMI) at conscription and risk for Ischemic stroke (IS) in patients diagnosed with Atrial fibrillation**

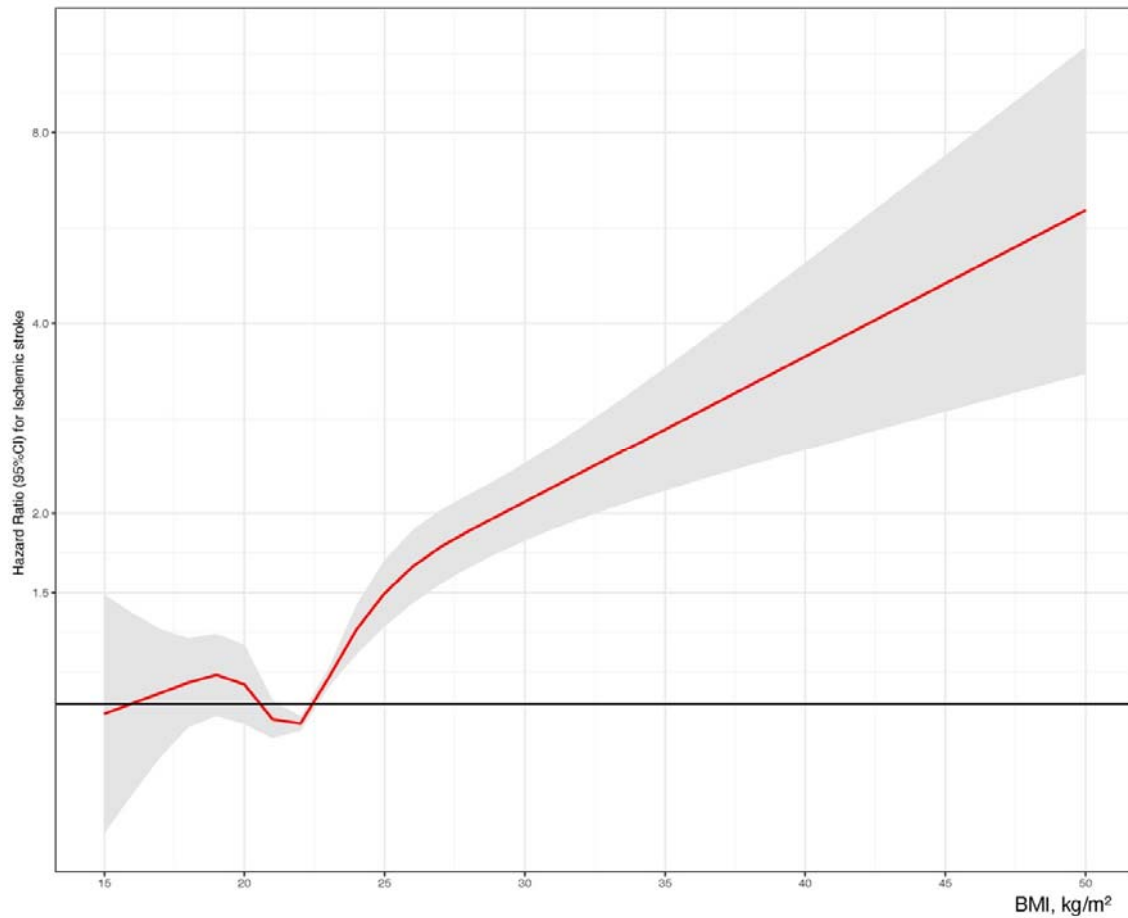

The model was unadjusted (n=35 013). BMI was restricted to BMI between 15 and 50 kg/m<sup>2</sup> and modelled as a restricted cubic spline with knots at 5%, 25%, 75%, and 95% (ie, 18.1, 20.0, 23.5, and 28.1 kg/m<sup>2</sup>), with BMI of 22.5 kg/m<sup>2</sup> as reference.
